# Supplementary material
Source: PubMed Central journal article supplement (PMC3262929)
Supplement: NIHMS336831-supplement-1.pdf [file NIHMS336831-supplement-1.pdf]

## Supplementary Figure S1

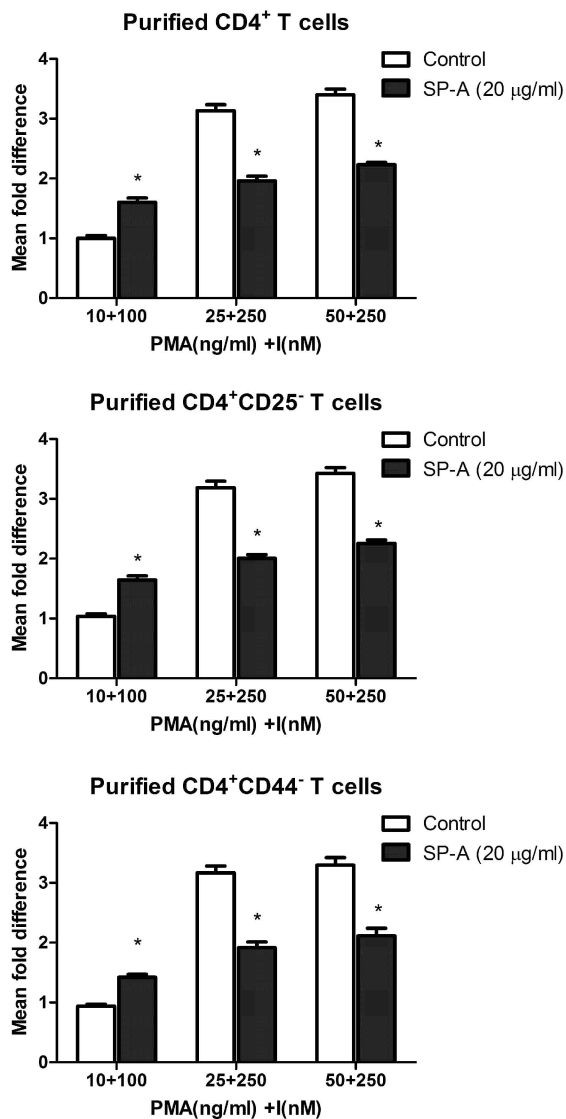

### **SP-A mediated modulation of T cell proliferation is an intrinsic property of the bulk T cell population.**

Equal numbers of purified T cells, or purified cells that were subject to C<sup>-</sup>-mediated depletion and magnetic selection to eliminate CD25<sup>+</sup> or CD44<sup>+</sup> T cells. Cells were then activated with different concentrations of PMA+I as previously described. For comparison of the different populations, the mean cpm obtained from replicate culture wells was normalized to undepleted, purified CD4<sup>+</sup> cells activated with the lowest concentration of PMA+I. \*p<0.02 compared to respective controls from 3 independent experiments.

Cells activated with relatively low signal strengths show an increase in proliferation in the presence of SP-A, whereas cells activated with stronger signals are inhibited. This activation profile was unaffected by depletion of either CD4<sup>+</sup>CD25<sup>+</sup> (~regulatory) or CD4<sup>+</sup>CD44<sup>+</sup> (~memory) T cells, suggesting that the SP-A/signal strength mediated 'switch' mechanism is an intrinsic property of the global T cell population.
